# Supplementary material
Source: publisher site journal article supplement (https://www.dovepress.com/article/360363)
Supplement: Supplementary file 1 [file get_supplementary_file.php]

**Supplementary materials**


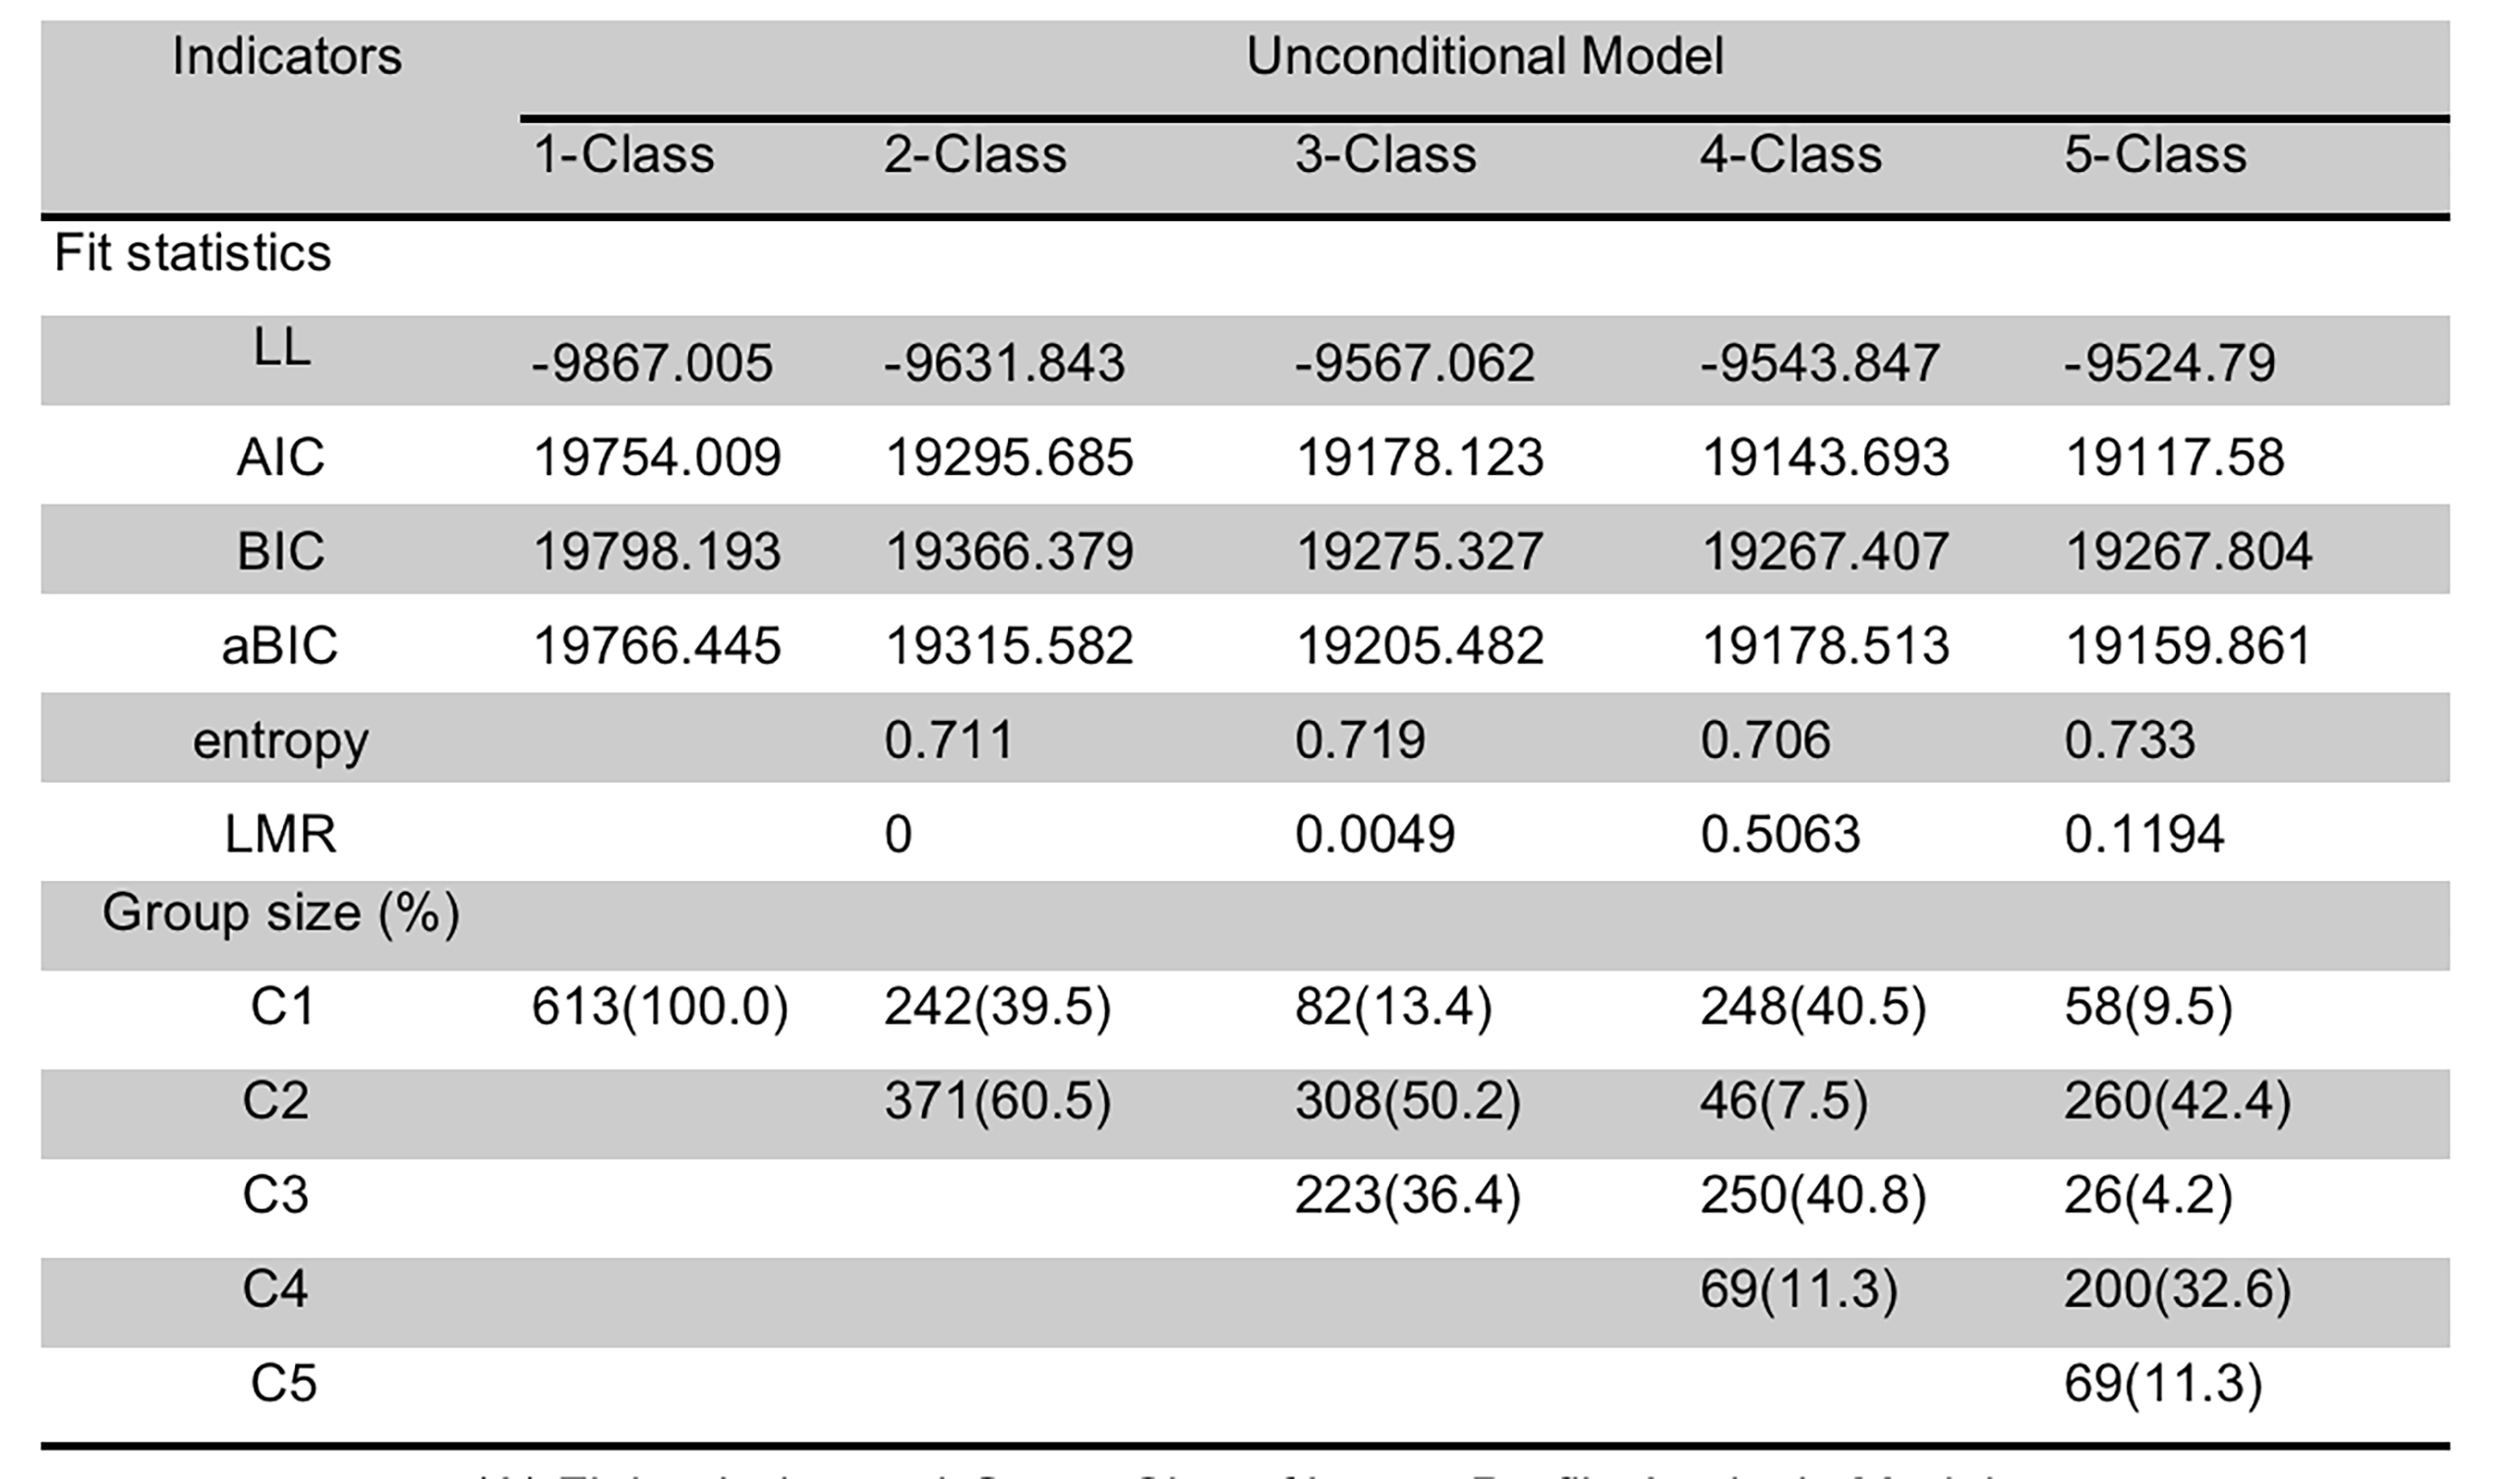


**Supplementary Table S1**: Fitting index and Groups Size of Latent Profile Analysis Models


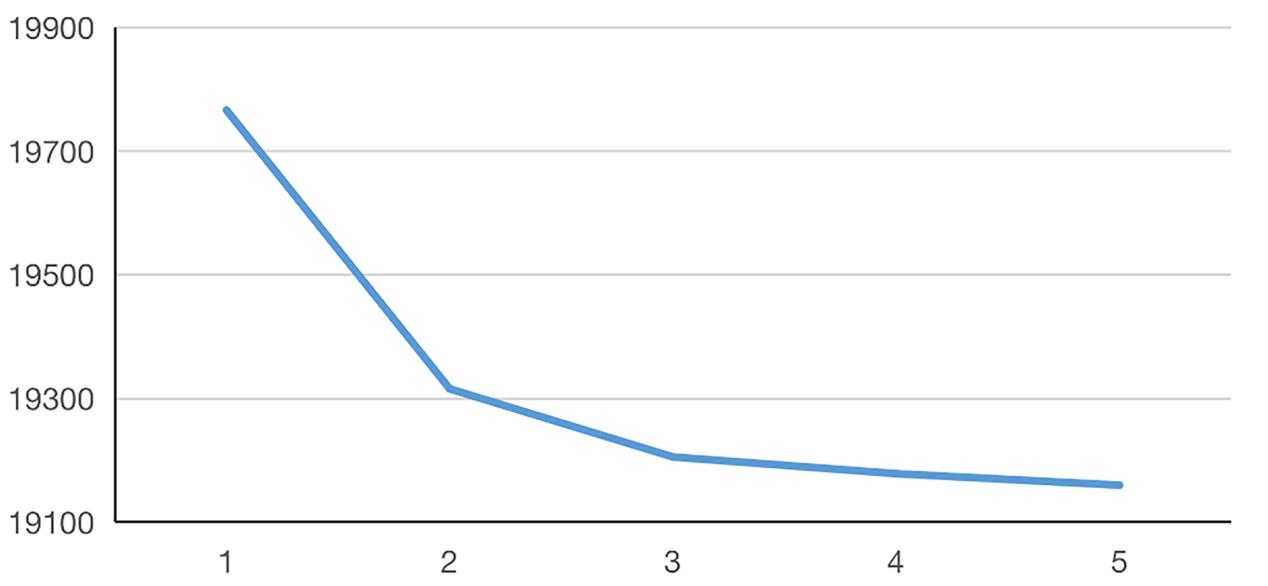


**Supplementary Figure S1:** The steep slopes of aBIC
